# Supplementary material
Source: MDPI journal article supplement (https://www.mdpi.com/2409-515X/9/3/52)
Supplement: s1 [file s1]

# Supplementary Materials

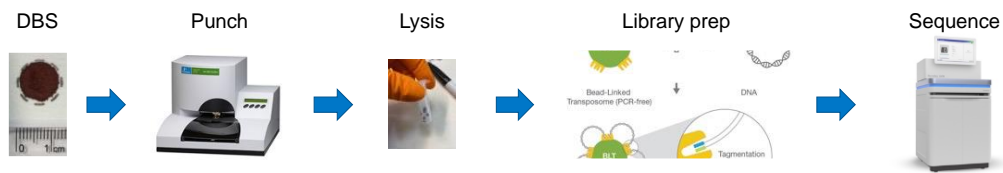

**Figure S1.** Overview of the DBS input workflow. A sub-punch of the DBSs was taken using a DBS puncher and incubated with lysis buffer. DNA was recovered from the lysate by bead purification, then used as an input for transposon-based library prep. The resultant libraries were sequenced on a NovaSeq 6000.

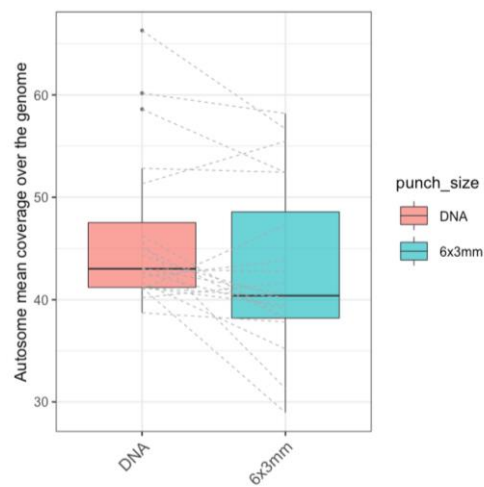

**Figure S2.** Performance of extracted DNA vs. DBSs across the 40 participants. Average autosomal coverage over the genome achieved across the 40 samples (median = 44.6 $\times$ , range = 29.0 $\times$ –66.3 $\times$ ). Data obtained from the same participant are linked by dotted lines.

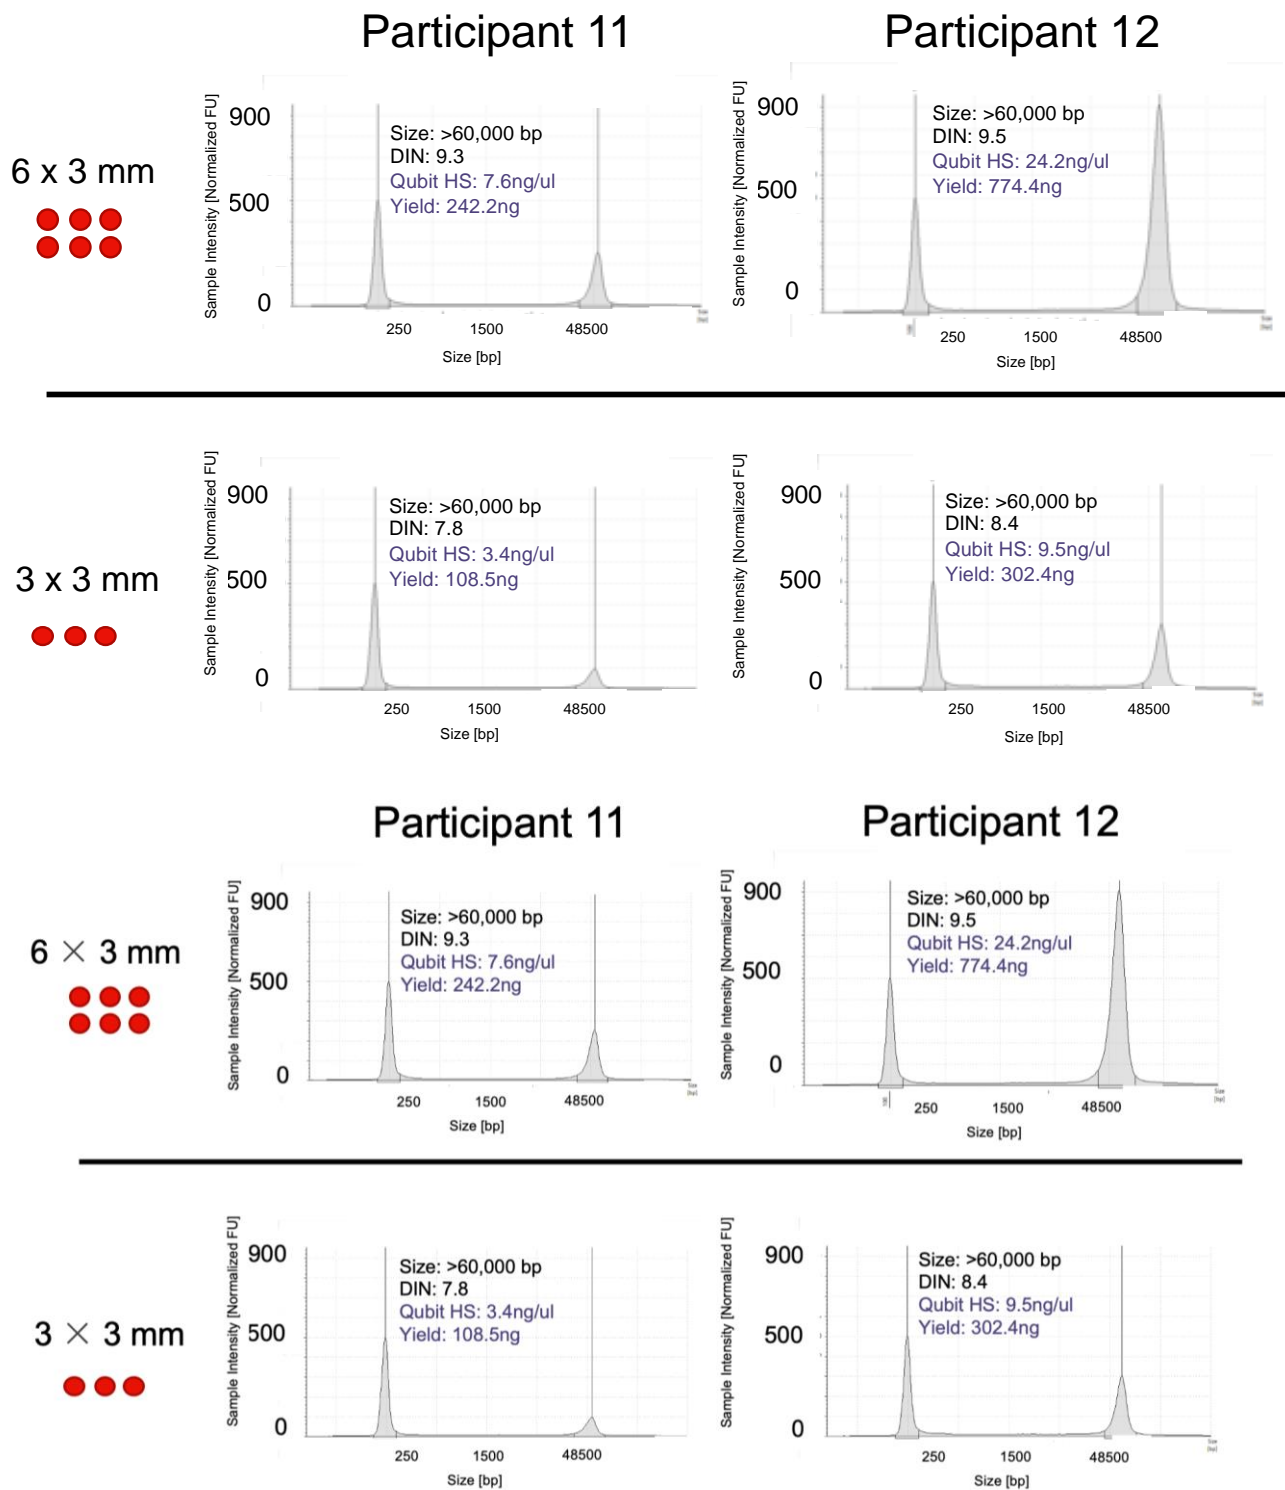

**Figure S3.** High-quality DNA is available as an input for library preparation from the Illumina Lysis Reagent kit. Remaining lysate material from 6 × 3 mm and 3 × 3 mm library preparation reactions for 2 samples were run on Agilent TapeStation. Y axis: sample intensity (normalized fluorescence units), X axis: predicted size of molecules in base pairs. DIN: DNA integrity number output from Agilent software. Leftmost peak in all traces is the supplied control marker; right peak is genomic DNA. All samples result in fragments of >60 Kbp. DNA concentration, as determined by Qubit HS assay, and resultant calculated input for the library preparation assay shown for comparison.
